# Supplementary material
Source: Research Square preprint supplement (doi:10.21203/rs.3.rs-9583044/v1)
Supplement: Supplementary file 1 [file 35cbc4e5dc7477d2f34efcb5.docx]

**Research Highlights**

*Quorum Sensing Signalling Molecules in Cocoa Pulp Wine Fermentation: A Systematic Review*

Anthony Oppong Kyekyeku, Margaret Owusu, John Edem Kongor, Daniel Sitsofe Yabani

- QS signalling governs cocoa pulp wine fermentation phase transitions beyond substrate depletion and oxygen availability.
- A novel four-component QS pathway framework is proposed and juxtaposed against the De Vuyst–Weckx succession, fluxome, kinetic ODE, and Shetty PLPPP models.
- The farnesol-to-tyrosol ratio governs ester biosynthesis and aromatic character during the yeast-dominant phase of cocoa pulp wine.
- AI-2-competent LAB strains drive controlled acidification; the documented luxS frameshift in L. fermentum 87 may explain batch-to-batch pH variability.
- AHL-gated AAB oxidation determines volatile acidity — the single most important sensory defect threshold in cocoa pulp wine.
- LC–MS/MS, adapted to the polyphenol-rich cocoa matrix, is identified as the essential analytical platform for in situ QS detection.
