# Supplementary material
Source: Research Square preprint supplement (doi:10.21203/rs.3.rs-9583044/v1)
Supplement: Supplementary file 2 [file 7f1f4833d05d4fe4aba6f947.docx]

**PRISMA 2020 Checklist — Completed**

*Quorum Sensing Signalling Molecules in Cocoa Pulp Wine Fermentation: A Systematic Review*

Anthony Oppong Kyekyeku, Margaret Owusu, John Edem Kongor, Daniel Sitsofe Yabani · Search executed 6 April 2026

*Page MJ et al. (2021). The PRISMA 2020 statement: an updated guideline for reporting systematic reviews. PLoS Med 18(3):e1003583. doi:10.1371/journal.pmed.1003583*

**Status key: Yes** = Reported fully · **Partial** = Reported with explanation · **N/A** = Not applicable (justification provided)

| **Section** | **Item** | **Item name** | **Reporting recommendation** | **Location in manuscript** | **Status** |
| --- | --- | --- | --- | --- | --- |
| **TITLE** | 1 | Title | Identify the report as a systematic review. | Title page (p. 1): "Quorum Sensing Signalling Molecules in Cocoa Pulp Wine Fermentation: A Systematic Review" | **Yes** |
| **ABSTRACT** | 2 | Abstract | See the PRISMA 2020 for Abstracts checklist. | Abstract (p. 1): covers rationale, objectives, eligibility criteria, information sources, risk of bias, synthesis methods, results, limitations, conclusions. | **Yes** |
| **INTRODUCTION** | 3 | Rationale | Describe the rationale for the review in the context of existing knowledge. | Section 1 (Introduction): QS role in cocoa pulp wine fermentation is uncharacterised despite its mechanistic plausibility; gap identified relative to other food fermentation systems. | **Yes** |
|  | 4 | Objectives | Provide an explicit statement of the objective(s) or question(s) the review addresses. | Section 1, final paragraph: aim is to synthesise QS biomolecule evidence and establish a comparative framework for cocoa pulp wine fermentation. | **Yes** |
| **METHODS** | 5 | Eligibility criteria | Specify the inclusion and exclusion criteria for the review and how studies were grouped for the syntheses. | Section 2.3: studies included if they characterised bacterial/fungal QS mechanisms; examined QS in fermented food ecosystems; reported experimental QS detection/quantification; or analysed microbial succession relevant to cocoa/fruit fermentations. | **Yes** |
|  | 6 | Information sources | Specify all databases, registers, websites, organisations, reference lists, and other sources searched or consulted to identify studies. Specify the date when each source was last searched or consulted. | Section 2.2: Scopus, PubMed, ScienceDirect (searched 6 April 2026; period 1985–December 2025); reference lists of all eligible studies hand-searched. Web of Science attempted but inaccessible (acknowledged limitation). | **Yes** |
|  | 7 | Search strategy | Present the full search strategies for all databases and any additional sources, including any limits applied, such that the search strategy could be replicated. | Section 2.2: full Boolean search strings documented for all three databases. Original database export files (Scopus CSV, PubMed CSV, ScienceDirect RIS) provided as supplementary search files. | **Yes** |
|  | 8 | Selection process | Specify the methods used to decide whether a study met the inclusion criteria of the review, including how many reviewers screened each record and each report retrieved for eligibility, whether they worked independently, and if applicable, details of automation tools used in the process. | Section 2.2–2.3: single-reviewer screening by the lead author (AOK); eligibility criteria applied consistently at title/abstract and full-text stages as documented in PRISMA flow diagram (Figure 1). | **Partial** |
|  | 9 | Data collection process | Specify the methods used to collect data from reports, including how many reviewers collected data from each report, whether they worked independently, any processes for obtaining or confirming information from study investigators, and if applicable, details of automation tools used. | Section 2.4: structured data extraction template applied across all 61 included studies; single reviewer; template captures QS molecules, microbial species, signalling pathways, regulated phenotypes, fermentation context, analytical techniques. | **Partial** |
|  | 10 | Data items | List and define all outcomes for which data were sought. Specify whether all results that were compatible with each outcome domain in each eligible study were sought, and if not, the methods used to decide which results to collect. | Section 2.4: data items include QS molecules identified, microbial species, signalling pathways characterised, functional phenotypes regulated, fermentation context, analytical/genetic techniques employed. | **Yes** |
|  | 11 | Study risk of bias assessment | Specify the methods used to assess risk of bias in the included studies, including details of the tool(s) used, how many reviewers assessed each study, and whether they worked independently. | Section 2.3: studies appraised for methodological quality, clarity of QS detection techniques, ecological relevance, and mechanistic depth, with emphasis on reports employing LC–MS, GC–MS, NMR, bioassays, genetic, and transcriptomic approaches. Formal risk-of-bias scoring tools were not applied. | **Partial** |
|  | 12 | Effect measures | Specify for each outcome the effect measure(s) used in the synthesis or presentation of results. | Not applicable: this is a narrative mechanistic systematic review. No pooled effect estimates were calculated. Evidence was integrated qualitatively across QS modalities and fermentation systems. | **N/A** |
|  | 13 | Synthesis methods | Describe the methods used to synthesise results and, if done, explain the reasons for the approach taken. | Section 2.4: narrative synthesis applied given mechanistic heterogeneity of included studies. Comparative analyses employed to contextualise cocoa pulp fermentation within broader food ecology literature. No statistical meta-analysis conducted. | **Yes** |
|  | 14 | Reporting bias assessment | Describe any methods used to assess risk of bias due to missing results in a synthesis. | Not applicable: narrative synthesis; no quantitative pooling. Publication bias assessment tools (e.g., funnel plots) are not applicable to mechanistic QS evidence synthesis. | **N/A** |
|  | 15 | Certainty assessment | Describe any methods used to assess certainty (or confidence) in the body of evidence for an outcome. | Section 3.3, Table 1: evidence strength categorised as Direct (detected/quantified in cocoa contexts), Indirect (inferred from genomics or analogous systems), or Inferred (mechanistically plausible but not experimentally tested). | **Yes** |
| **RESULTS** | 16 | Study selection | Describe the results of the search and selection process, including the number of records identified and screened, the number that met the eligibility criteria, and the reasons for exclusion from full-text screening. | Section 2.2–2.3 and Figure 1 (PRISMA flow diagram): 711 records identified; 154 removed at deduplication stage (86 cross-database duplicates + 68 out-of-range 2026 records); 557 screened; 453 excluded at title/abstract; 104 full texts assessed; 43 excluded; 61 included. | **Yes** |
|  | 17 | Study characteristics | Cite each included study and present its characteristics. | Section 3 and Tables 1–2: studies described by QS molecule type, organism class, regulated phenotypes, detection methods, and cocoa evidence category. Individual studies cited in context throughout. | **Yes** |
|  | 18 | Risk of bias in studies | Present assessments of risk of bias for each included study. | Section 2.3: methodological quality assessed per study; limitations of individual studies noted in context throughout Section 3. Formal risk-of-bias scoring not applicable to mechanistic QS review. | **Partial** |
|  | 19 | Results of individual studies | For all outcomes, present for each study the summary statistics for each group, and the effect estimate and its precision. | Not applicable: no quantitative outcome data were extracted or pooled. Results presented as narrative mechanistic evidence by QS modality. | **N/A** |
|  | 20 | Results of syntheses | For each synthesis, present the results of each meta-analysis or other synthesis methods used. | Section 3.3, Tables 1–2: narrative synthesis results summarised by QS signal type, organism, phenotype, and sensory consequence. Evidence asymmetry between bacterial (direct), AAB (indirect), and fungal (inferred) QS explicitly characterised. | **Yes** |
|  | 21 | Reporting biases | Present assessments of risk of bias due to missing results in a synthesis. | Not applicable: narrative synthesis; no pooled effect estimates generated. | **N/A** |
|  | 22 | Certainty of evidence | Present assessments of certainty (or confidence) in the body of evidence for each outcome. | Section 3.3, Table 1: three-tier evidence classification (Direct/Indirect/Inferred) applied to all QS modalities. Limitations explicitly stated per subsection throughout Section 3. | **Yes** |
| **DISCUSSION** | 23 | Discussion | Provide a general interpretation of the results in the context of other evidence. | Sections 3.4–3.7 and Section 4 (Conclusion): evidence synthesised relative to existing fermentation frameworks; QS pathway framework juxtaposed against De Vuyst–Weckx succession model, Adler fluxome, kinetic ODE models, and Shetty PLPPP model. | **Yes** |
|  | 24 | Limitations | Discuss any limitations of the evidence included in the review. | Limitations documented throughout: (i) QS detection limited to genomic inference in cocoa context; (ii) polyphenol interference with LC–MS/MS detection; (iii) AHL/AI-2 characterisation primarily in non-cocoa matrices; (iv) fungal QS almost entirely from pathogenic Candida contexts; (v) Web of Science search interface inaccessible. | **Yes** |
|  | 25 | Conclusions | Provide a general interpretation of the results in the context of other evidence, and implications for future research. | Section 4 (Conclusion): QS established as mechanistically tractable regulatory layer; LC–MS/MS analytical roadmap identified; QS-guided starter culture design framed as a high-impact research priority for Ghana and cocoa-producing regions. | **Yes** |
| **OTHER INFO** | 26 | Registration and protocol | Provide registration information for the review, including register name and registration number, or state that the review was not registered. | This review was not pre-registered. The review protocol was developed a priori as described in Section 2.1, adhering to PRISMA 2020 standards. | **Partial** |
|  | 27 | Support | Describe sources of financial or other support for the review, and the role of the funders or sponsors in the review. | Declarations: no external funding was received for this work. | **Yes** |
|  | 28 | Competing interests | Declare any competing interests of review authors. | Declarations: the authors declare no conflict of interest. | **Yes** |
|  | 29 | Availability of data, code, and other materials | Report which of the following are publicly available and where they can be accessed: template data collection forms; data extracted from included studies; data used for all analyses; analytic code; any other materials used in the review. | Original database export files (Scopus CSV, PubMed CSV, ScienceDirect RIS ×7) provided as supplementary search files. No primary datasets generated. | **Yes** |

**Notes on partial compliance (items 8, 9, 11, 18, 26):**

**Items 8–9:** Single-reviewer screening and data extraction are a recognised limitation of single-reviewer systematic reviews; this is acknowledged in Section 2.3 and constitutes a study limitation. **Item 11:** Formal risk-of-bias scoring tools (e.g., AMSTAR-2) were not applied as this is a mechanistic narrative synthesis rather than an intervention or diagnostic review; methodological quality was assessed qualitatively per study. **Item 18:** Per-study risk-of-bias tables are not presented; quality appraisal is embedded in the narrative synthesis throughout Section 3, with explicit limitations noted per subsection. **Item 26:** Pre-registration was not conducted prior to the review. Retrospective registration in PROSPERO can be completed prior to peer-reviewed journal submission if required.

*Cite as: Page MJ, McKenzie JE, Bossuyt PM, et al. The PRISMA 2020 statement: an updated guideline for reporting systematic reviews. PLoS Med. 2021;18(3):e1003583. doi:10.1371/journal.pmed.1003583*
